# Supplementary material for: Ring-opening homo- and co-polymerization of lactides and ε-caprolactone by salalen aluminum complexes
Source: Royal Society of Chemistry journal article supplement (doi:10.1039/c4dt02616k), 2014-12-02
Supplement: c4dt02616k1.pdf [file c4dt02616k1.pdf]

## SUPPORTING INFORMATION

### **Ring-Opening Homo- and Co-polymerization reaction of $\epsilon$ -Caprolactone and Lactides by Salalen Aluminum Complexes**

Alessia Pilone,<sup>†</sup> Nicolina De Maio,<sup>†</sup> Konstantin Press,<sup>‡</sup> Vincenzo Venditto,<sup>†</sup> Daniela Pappalardo,<sup>§</sup> Mina Mazzeo,<sup>†</sup> Claudio Pellecchia,<sup>†</sup> Moshe Kol<sup>‡</sup> and Marina Lamberti<sup>†,\*</sup>

<sup>†</sup>Dipartimento di Chimica e Biologia, Università di Salerno Via Giovanni Paolo II, 132, 84084 Fisciano, Italy

<sup>‡</sup>School of Chemistry, Tel Aviv University Ramat Aviv, Tel Aviv 69978, Israel

<sup>§</sup>Dipartimento di Scienze e Tecnologie, Università del Sannio, via dei Mulini 59/A, 82100 Benevento, Italy

## NMR characterization of complex **2b**.

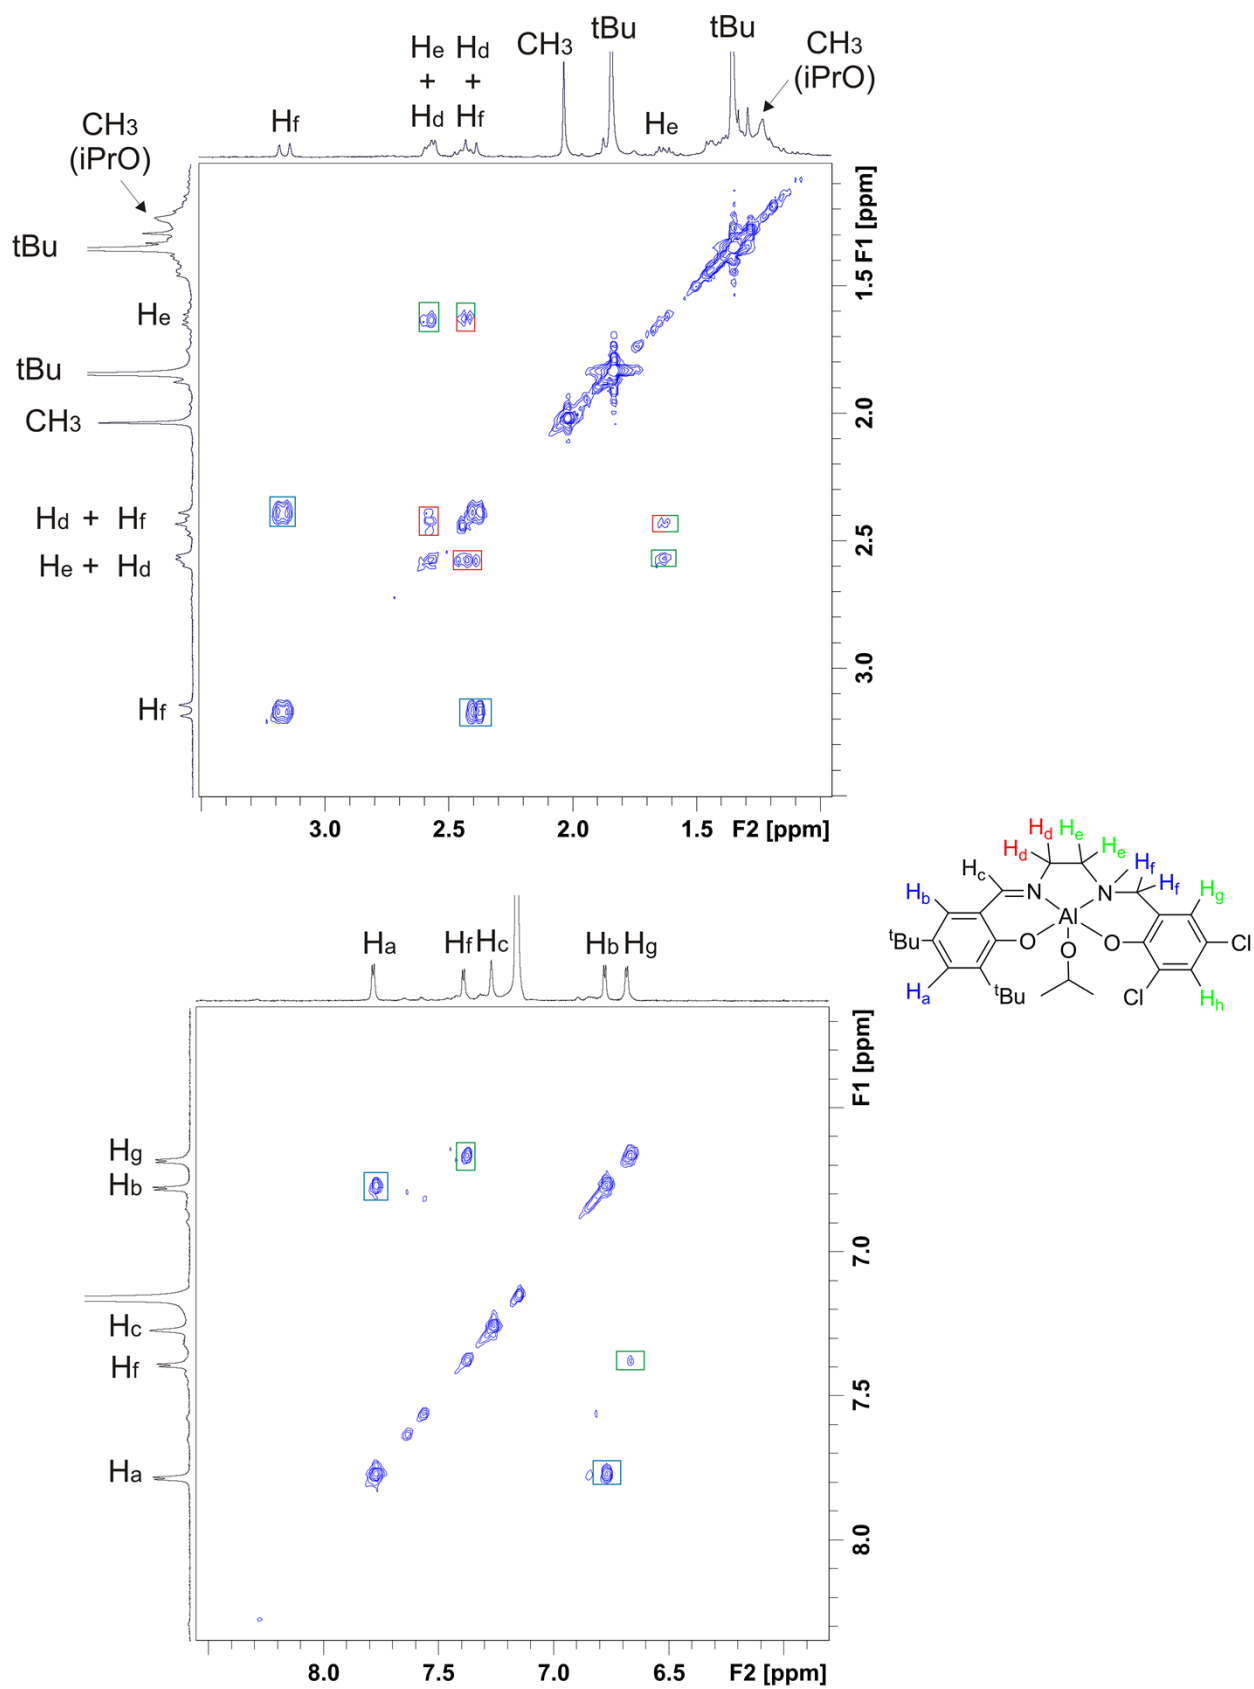

**Figure S1.** Aliphatic (up) and aromatic (down) area of NMR COSY spectrum of complex **2b** ( $C_6D_6$ ).

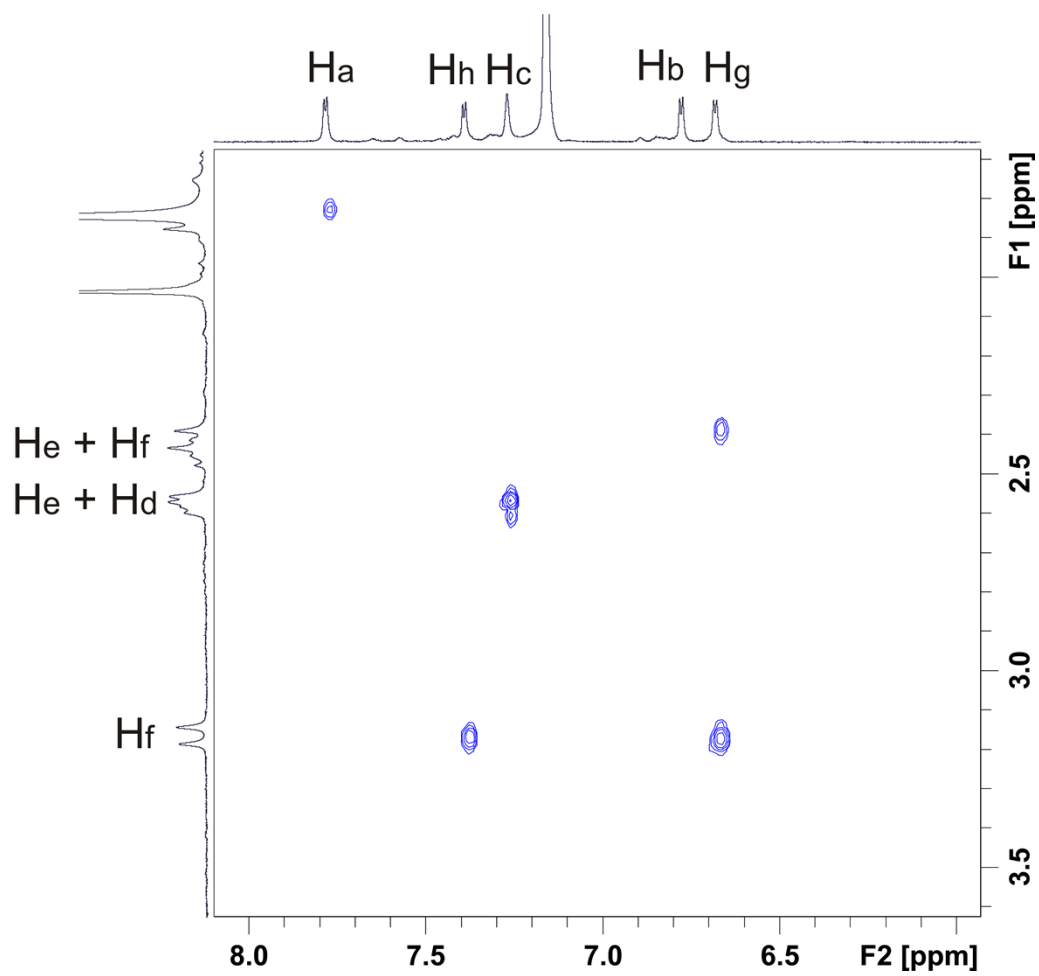

**Figure S2.** Aliphatic/aromatic cross peaks of NMR COSY spectrum of complex **2b** ( $C_6D_6$ ).

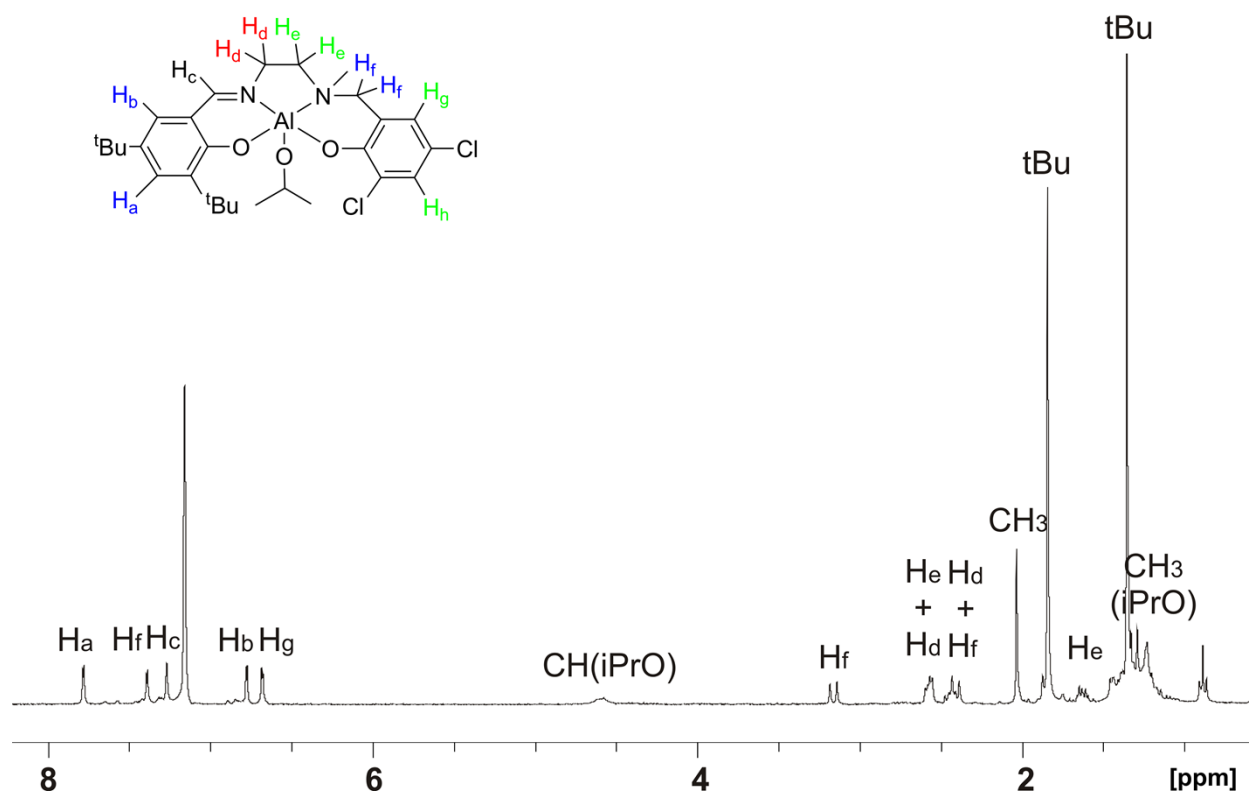

**Figure S3.**  $^1\text{H}$  NMR spectrum of complex **2b** ( $\text{C}_6\text{D}_6$ ).

**Table S1.** Tetrad probabilities based on Bernoullian Statistic (Th) and experimental values (Exp) as obtained by NMR analysis (entry 2, Table 1).  $P_m = 0.72$

| <b>Tetrad</b> | <b>Formula</b>          | <b>Th</b> | <b>Exp</b> |
|---------------|-------------------------|-----------|------------|
| [mmm]         | $P_m^2 + P_r P_m / 2$   | 0.621     | 0.621      |
| [mmr]         | $P_r P_m / 2$           | 0.101     | 0.099      |
| [rmm]         | $P_r P_m / 2$           | 0.101     | 0.101      |
| [rmr]         | $P_r^2 / 2$             | 0.039     | 0.049      |
| [mrm]         | $(P_r^2 + P_r P_m) / 2$ | 0.140     | 0.130      |

**Table S2.** Tetrad probabilities based on Enantiomorphic Site Control Statistic (Th) and experimental values (Exp) as obtained by NMR analysis (entry 2, Table 1).  $\alpha = 0.81$

| <b>Tetrad</b> | <b>Formula</b>                                            | <b>Th</b> | <b>Exp</b> |
|---------------|-----------------------------------------------------------|-----------|------------|
| [mmm]         | $[\alpha^2 + (1-\alpha)^2 + \alpha^3 + (1-\alpha)^3] / 2$ | 0.621     | 0.621      |
| [mmr]         | $[\alpha^2(1-\alpha) + \alpha(1-\alpha)^2] / 2$           | 0.077     | 0.099      |
| [rmm]         | $[\alpha^2(1-\alpha) + \alpha(1-\alpha)^2] / 2$           | 0.077     | 0.101      |
| [rmr]         | $[\alpha^2(1-\alpha) + \alpha(1-\alpha)^2] / 2$           | 0.077     | 0.049      |
| [mrm]         | $[\alpha(1-\alpha) + \alpha(1-\alpha)] / 2$               | 0.154     | 0.130      |

**Table S3.** Tetrad probabilities based on Bernoullian Statistic (Th) and experimental values (Exp) as obtained by NMR analysis (entry 3, Table 1).  $P_m = 0.69$

| Tetrad | Formula                 | Th    | Exp   |
|--------|-------------------------|-------|-------|
| [mmm]  | $P_m^2 + P_r P_m / 2$   | 0.583 | 0.583 |
| [mmr]  | $P_r P_m / 2$           | 0.107 | 0.112 |
| [rmm]  | $P_r P_m / 2$           | 0.107 | 0.131 |
| [rmr]  | $P_r^2 / 2$             | 0.048 | 0.060 |
| [mrm]  | $(P_r^2 + P_r P_m) / 2$ | 0.155 | 0.114 |

**Table S4.** Ring-Opening Polymerization of L-lactide promoted by **2b** and **S-4b**.

| Monomer | Time | Conv | $M_n(\text{th})^c$<br>(Kg/mol) | $M_n(\text{GPC})^b$<br>(Kg/mol) | PDI  |
|---------|------|------|--------------------------------|---------------------------------|------|
| L-LA    | 25h  | 70%  | 20.2                           | 21.4                            | 1.05 |

<sup>a</sup> Conditions: initiator: **2b**: 10  $\mu\text{mol}$  + **S-4b**: 10  $\mu\text{mol}$ ; toluene: 4 mL; lactide: 4 mmol; temperature: 80  $^\circ\text{C}$ .

<sup>b</sup> Experimental  $M_n$  values were determined by GPC analysis in THF using polystyrene standards and corrected by the factor 0.58.

<sup>c</sup>  $144.13 \times [\text{LA}]_0 / [\text{I}]_0 \times \text{conv LA}$ .

### Meso-Lactide

**Table S5.** Tetrad probabilities based on Bernoullian Statistic (Th) and experimental values (Exp) as obtained by  $^{13}\text{C}$  NMR analysis (entry 6, Table 1).  $P_m = 0.79$

| Tetrad | Formula                 | Th    | Exp   |
|--------|-------------------------|-------|-------|
| [rmr]  | $(P_m^2 + P_r P_m) / 2$ | 0.395 | 0.382 |
| [rrr]  | $P_r^2 + P_r P_m / 2$   | 0.127 | 0.136 |
| [rrm]  | $P_r P_m / 2$           | 0.083 | 0.078 |
| [mrr]  | $P_r P_m / 2$           | 0.083 | 0.090 |
| [mrm]  | $P_m^2 / 2$             | 0.314 | 0.314 |

**Table S6.** Tetrad probabilities based on Enantiomorphic Site Control Statistics (Th) and experimental values (Exp) as obtained by  $^{13}\text{C}$  NMR analysis (entry 6, Table 1).  $\alpha = 0.76$

| Tetrad         | Formula                                           | Th    | Exp   |
|----------------|---------------------------------------------------|-------|-------|
| [ <i>rmr</i> ] | $[\alpha(1-\alpha)+\alpha(1-\alpha)]/2$           | 0.182 | 0.382 |
| [ <i>rrr</i> ] | $[\alpha^2+(1-\alpha)^2+\alpha^3+(1-\alpha)^3]/2$ | 0.544 | 0.136 |
| [ <i>rrm</i> ] | $[\alpha^2(1-\alpha)+\alpha(1-\alpha)^2]/2$       | 0.078 | 0.078 |
| [ <i>mrr</i> ] | $[\alpha^2(1-\alpha)+\alpha(1-\alpha)^2]/2$       | 0.078 | 0.090 |
| [ <i>rrm</i> ] | $[\alpha^2(1-\alpha)+\alpha(1-\alpha)^2]/2$       | 0.078 | 0.314 |

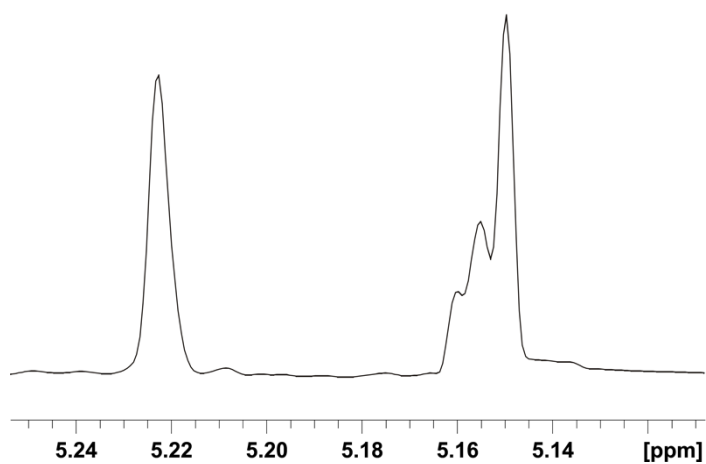

**Figure S4.** Homuncular decoupled  $^1\text{H}$  NMR of the PLA sample obtained by complex **2b** and *meso*-LA in toluene at 80 °C

**Determination of Reactivity Ratios:** The reactivity ratios were calculated using the nonlinear least squares (NLLS) method, carrying out the copolymerizations at low conversion with different ratios of the monomers.

**Table S7.** Copolymerization runs at low monomer conversions.

| Time   | [LA] <sub>0</sub> (f1) | [CL] <sub>0</sub> (f2) | LA conv.,% | CL conv.,% | LA in the copolymer (F1) | CL in the copolymer (F2) |
|--------|------------------------|------------------------|------------|------------|--------------------------|--------------------------|
| 10'    | 0.1                    | 0.9                    | 11         | 33         | 0.01                     | 0.99                     |
| 30'    | 0.3                    | 0.7                    | 6          | 20         | 0.12                     | 0.88                     |
| 1h 30' | 0.5                    | 0.5                    | 7          | 12         | 0.34                     | 0.66                     |
| 1h 30' | 0.7                    | 0.3                    | 7          | 13         | 0.58                     | 0.42                     |
| 1h 30' | 0.9                    | 0.1                    | 5          | 9          | 0.84                     | 0.16                     |

$$r_{CL} = 2.95 \quad r_{LA} = 0.85$$

### Thermal analysis of the L-LA/ε-CL copolymers.

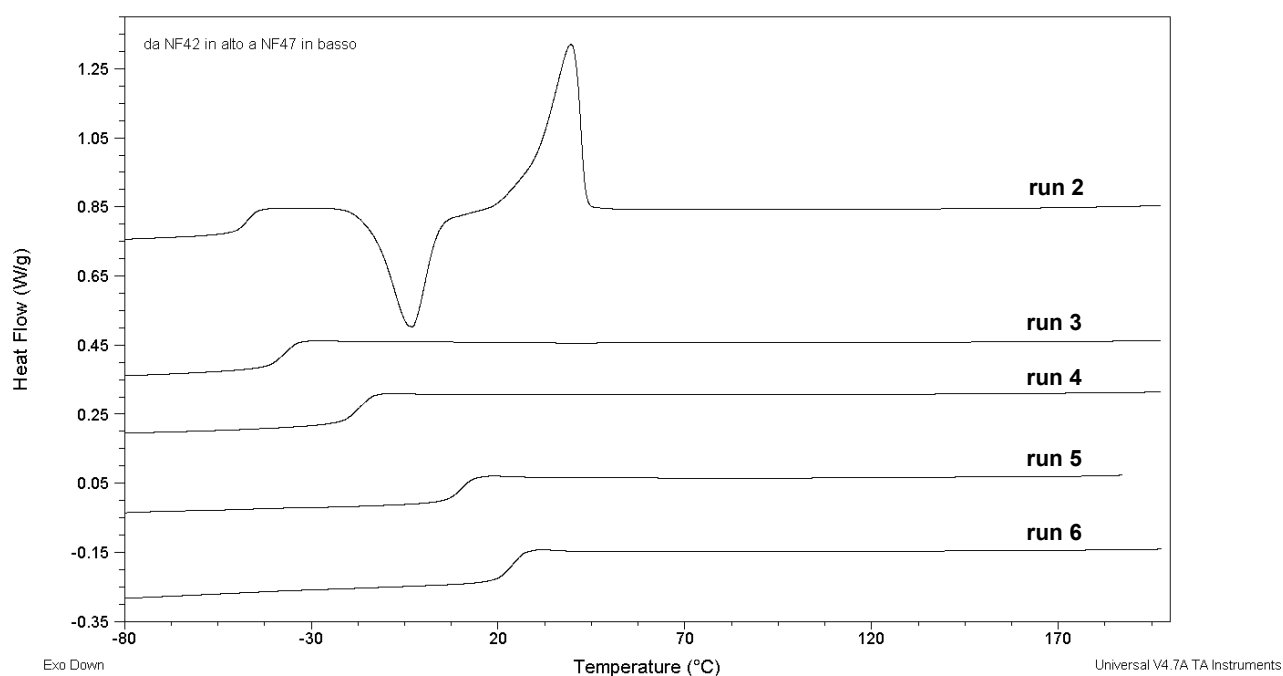

**Figure S5.** DSC (second heating run) of random L-LA/ε-CL copolymers reported in Table 2 of the paper.
